# Supplementary material
Source: Elsevier journal article supplement (https://www.sciencedirect.com/science/article/pii/S0014256515000624)
Supplement: mmc1 [file S0014256515000624:mmc1.docx]

La respuesta correcta es la 3.

En la Figura 1 se evidencia una vesícula distendida con aire en su pared formando un anillo (flecha negra) y nivel hidroaéreo (flecha blanca). El paciente es diagnosticado de colecistitis enfisematosa por lo que se inicia tratamiento antibiótico y se realiza colecistectomía en las siguientes 24 horas con buena evolución clínica.
